# Supplementary material for: Exploring the Antibacterial and Biosensing Applications of Peroxidase-Mimetic Ni0.1Cu0.9S Nanoflower
Source: MDPI journal article supplement (doi:10.3390/bios12100874), 2022-10-15
Supplement: s1 [file s1]

## Supplementary Materials:

# Exploring the antibacterial and biosensing applications of peroxidase-mimetic $\text{Ni}_{0.1}\text{Cu}_{0.9}\text{S}$ nanoflower

Li Liu,<sup>1†</sup> Yayu Lai,<sup>2†</sup> Jinming Cao,<sup>1</sup> Yu Peng,<sup>1</sup> Tian Tian<sup>\*1</sup> and Wensheng Fu<sup>\*1</sup>

<sup>1</sup> Chongqing Key Laboratory of Green Synthesis and Applications, College of Chemistry, Chongqing Normal University, Chongqing 401331, China

<sup>2</sup> The Department of General Practice, the 958th hospital of Chinese People's Liberation Army, Chongqing 400000, China

\* Correspondence: tthy6080@163.com (T.T.); fuwensheng@cqnu.edu.cn (W.F.)

† These authors contributed equally to this work.

**Keywords:** peroxidase mimetic; reactive oxygen species; antibacterial application; biosensing; copper-containing nanozymes

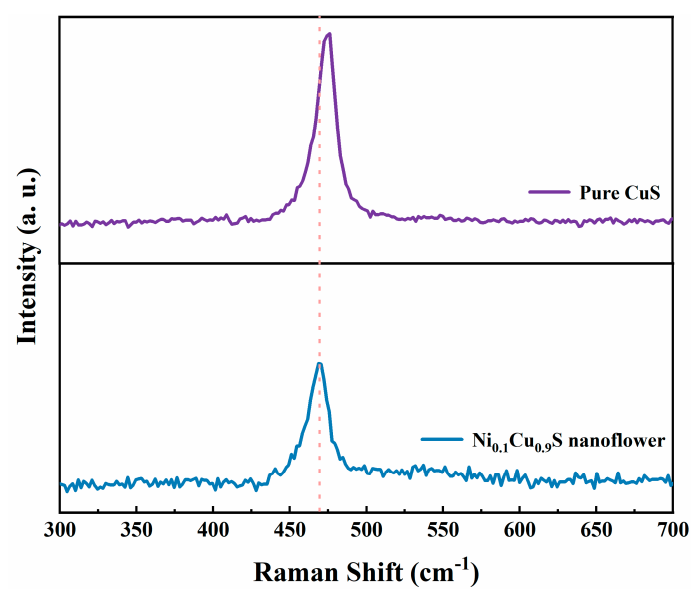

**Figure S1.** The Raman spectra of Ni<sub>0.1</sub>Cu<sub>0.9</sub>S nanoflower and pure CuS.

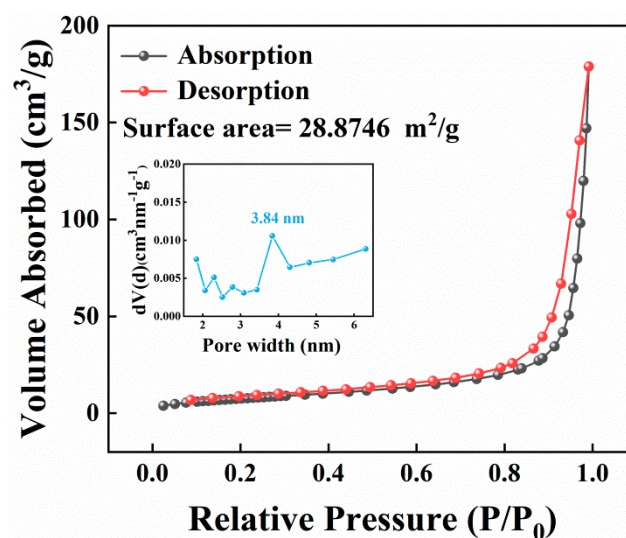

**Figure S2.** N<sub>2</sub> adsorption-desorption isotherm of the Ni<sub>0.1</sub>Cu<sub>0.9</sub>S nanoflower. The inset is the corresponding pore size distribution curve.

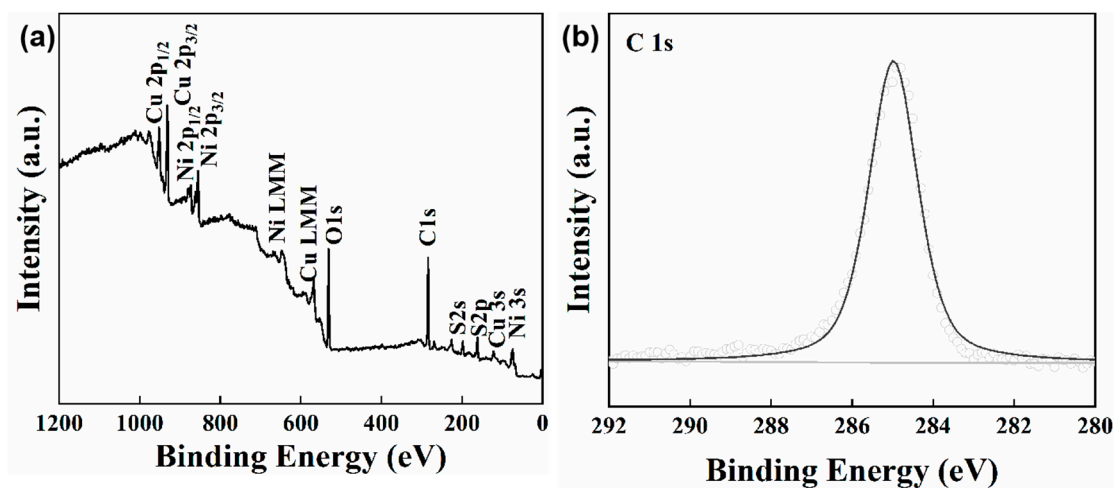

**Figure S3.** (a) The XPS survey scan of the Ni<sub>0.1</sub>Cu<sub>0.9</sub>S nanoflower. (b) High-resolution XPS spectrum of C 1s for Ni<sub>0.1</sub>Cu<sub>0.9</sub>S nanoflower.

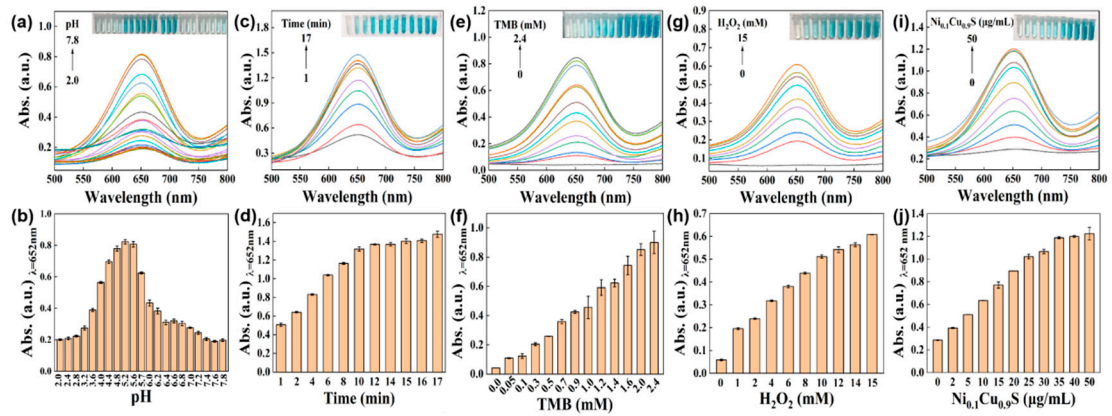

**Figure S4.** The influences of (a-b) pH value, (c-d) reaction time, (e-f) TMB concentration, (g-h)  $\text{H}_2\text{O}_2$  concentration and (i-j) catalyst concentration on the peroxidase-like activity of the  $\text{Ni}_{0.1}\text{Cu}_{0.9}\text{S}$  nanozyme. The error bars represent the standard deviation values of three measurements.

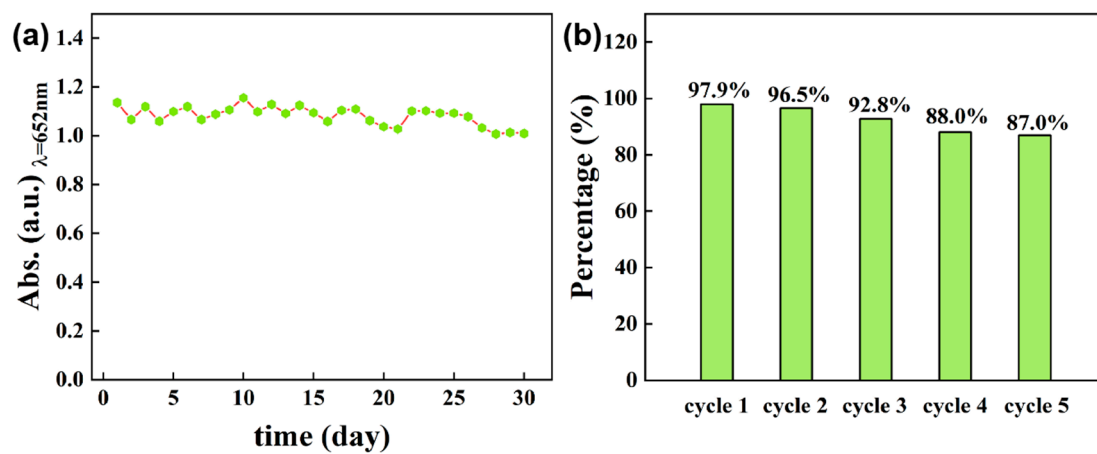

**Figure S5.** (a) Long-term stability of Ni<sub>0.1</sub>Cu<sub>0.9</sub>S nanozyme for peroxidase-like activity. (b) The UV-vis absorption value of relative catalytic activity for five cyclic experiments.

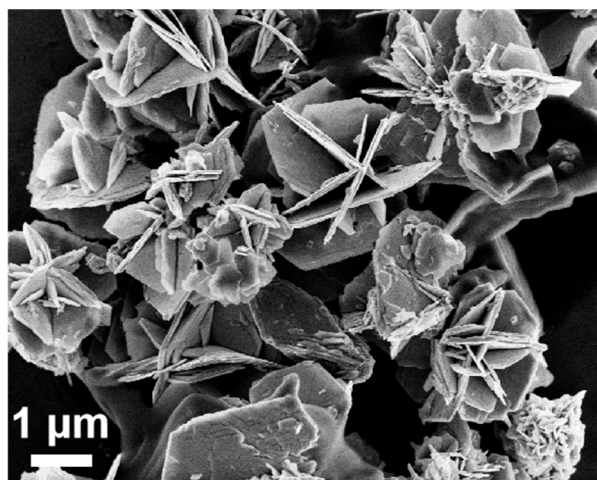

**Figure S6.** The SEM image of Ni<sub>0.1</sub>Cu<sub>0.9</sub>S nanozyme after the stability test.

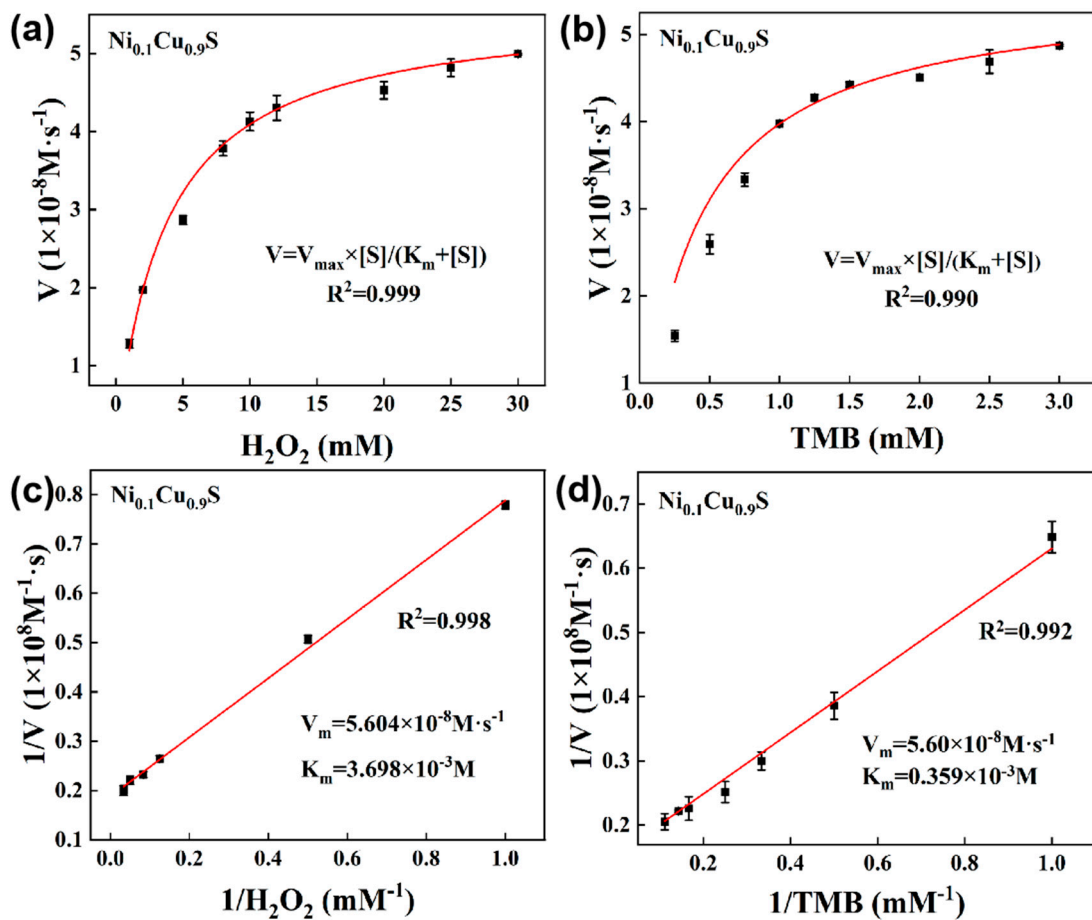

**Figure S7.** (a) and (b) the Michaelis-Menten curve for  $\text{H}_2\text{O}_2$  and TMB, respectively. (c) and (d) the Line weaver-Burk plot for determination of kinetic constant of  $\text{Ni}_{0.1}\text{Cu}_{0.9}\text{S}$  nanoflower for  $\text{H}_2\text{O}_2$  and TMB, respectively.



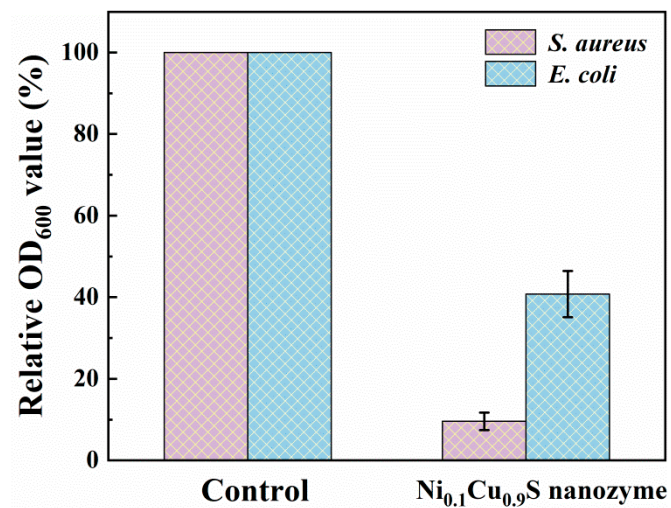

**Figure S8.** Relative OD<sub>600</sub> values of Ni<sub>0.1</sub>Cu<sub>0.9</sub>S nanozyme towards *E. coli* and *S. aureus*.

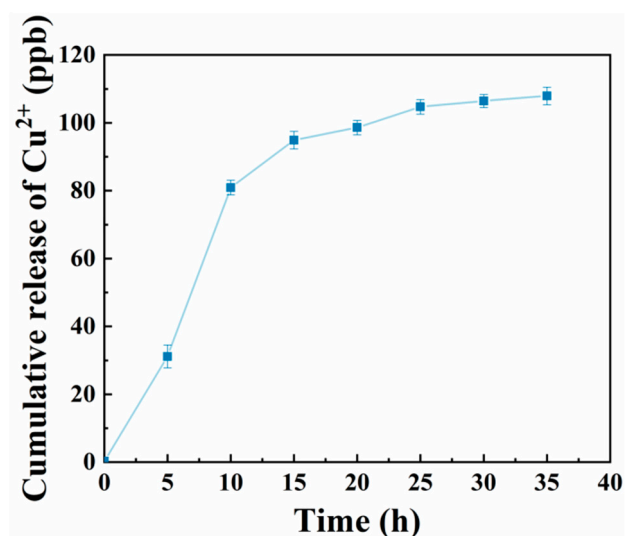

**Figure S9.** The release curve of time-dependent  $\text{Cu}^{2+}$  of  $\text{Ni}_{0.1}\text{Cu}_{0.9}\text{S}$  nanozyme in test system plotted with data obtained by ICP.

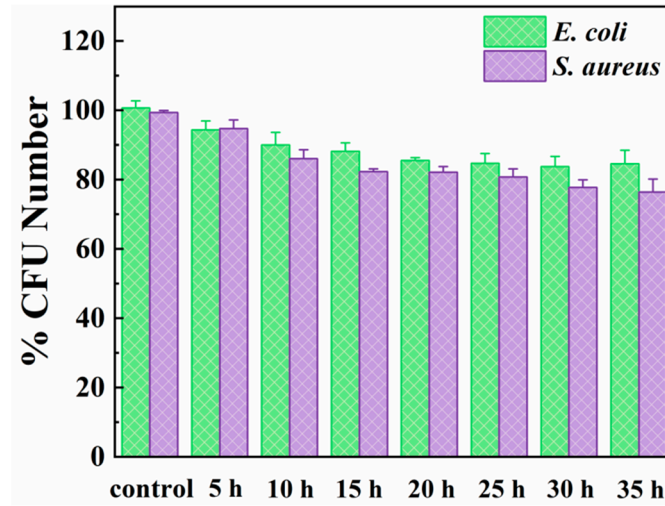

**Figure S10.** Survival rates of *E. coli* and *S. aureus* treated with  $\text{Cu}^{2+}$  supernatant samples.

**Table S1.** Summary of ICP-OES results for Ni<sub>0.1</sub>Cu<sub>0.9</sub>S nanoflower.

| Element | Wt.%  | Atom ratio          |
|---------|-------|---------------------|
| Ni      | 5.97  | Ni:Cu=<br>0.10:0.86 |
| Cu      | 54.67 |                     |
| S       | 8.25  |                     |

**Table S2.** Comparison of the  $K_m$  and  $V_{max}$  values for  $Ni_{0.1}Cu_{0.9}S$  nanoflower with those of other peroxidase mimicas.

| Systems                                                 | Signal<br>output | $K_m/mM$ |                               | $V_{max}/(10^{-8} M \cdot s^{-1})$ |                               | Ref.         |
|---------------------------------------------------------|------------------|----------|-------------------------------|------------------------------------|-------------------------------|--------------|
|                                                         |                  | TMB      | H <sub>2</sub> O <sub>2</sub> | TMB                                | H <sub>2</sub> O <sub>2</sub> |              |
| TPyP-CuS                                                | Colorimetry      | 0.106    | 3.937                         | 5.30                               | 2.139                         | [54]         |
| CuS-BSA                                                 | Colorimetry      | 0.2      | 14                            | 3.3                                | 2                             | [55]         |
| MXene/CuS                                               | Colorimetry      | 0.072    | 2.08                          | 4.63                               | 6.34                          | [56]         |
| CuS                                                     | Colorimetry      | 0.534    | 3.219                         | 26.65                              | 2.90                          | [57]         |
| BNNS@CuS                                                | Colorimetry      | 0.175    | 25                            | 3.76                               | 12.5                          | [58]         |
| CuS-BSA-Cu <sub>3</sub> (PO <sub>4</sub> ) <sub>2</sub> | Colorimetry      | 0.33     | 0.29                          | 16                                 | 8.31                          | [59]         |
| PAN-CuO                                                 | Colorimetry      | 0.58     | 0.09                          | 20.14                              | 4.68                          | [27]         |
| Fe <sub>3</sub> O <sub>4</sub> -SL                      | Colorimetry      | 0.374    | 0.208                         | 6.298                              | 4.561                         | [60]         |
| Co <sub>3</sub> S <sub>4</sub> nanosheets               | Colorimetry      | 0.15     | 58.3                          | 33                                 | 33                            | [61]         |
| NiCo <sub>2</sub> S <sub>4</sub> (CTAB)NPs              | Colorimetry      | 0.036    | 6.46                          | 3.03                               | 9.28                          | [62]         |
| NiCo <sub>2</sub> S <sub>4</sub> (PVP)NPs               | Colorimetry      | 0.175    | 7.43                          | 7.97                               | 19.0                          | [63]         |
| Pt/CuCo <sub>2</sub> O <sub>4</sub>                     | Colorimetry      | 0.24     | 0.41                          | 56.4                               | 28.2                          | [63]         |
| $Ni_{0.1}Cu_{0.9}S$                                     | Colorimetry      | 2.541    | 7.293                         | 10.98                              | 5.409                         | This<br>work |

**Table S3.** The ICP-OES results of cumulative Cu<sup>2+</sup> release from Ni<sub>0.1</sub>Cu<sub>0.9</sub>S nanozyme in test system.

| Time                  | 0 h  | 5 h  | 10 h | 15 h | 20 h | 25 h | 30 h | 35 h |
|-----------------------|------|------|------|------|------|------|------|------|
| Cu <sup>2+</sup> Wt.% | 0.00 | 0.24 | 0.63 | 0.74 | 0.77 | 0.81 | 0.83 | 0.84 |

**Table S4.** Comparison of different sensors for AA detection.

| System                                                   | Signal output   | Time  | Stability | Linear range ( $\mu\text{M}$ ) | LOD ( $\mu\text{M}$ ) | Ref.      |
|----------------------------------------------------------|-----------------|-------|-----------|--------------------------------|-----------------------|-----------|
| TPyP-CuS                                                 | Colorimetry     | 1min  | No report | 1-30                           | 0.419                 | [54]      |
| Pal@Co <sub>3</sub> O <sub>4</sub> NCs                   | Colorimetry     | -     | No report | 1-60                           | 0.70                  | [59]      |
| CD-QD@SiO <sub>2</sub>                                   | Fluorescence    | 30min | No report | 0-70                           | 3.17                  | [64]      |
| S, N-CDs/PVA                                             | Fluorescence    | 2h    | No report | 10–500                         | 6.99                  | [60]      |
| Fe <sub>3</sub> O <sub>4</sub> @SiO <sub>2</sub> -Ag NPs | Colorimetry     | 2min  | No report | 30-100                         | 10.47                 | [65]      |
| [Ni(HL)(bpe)1.5(H <sub>2</sub> O)]                       | Fluorescence    | 30min | No report | 2-10                           | 1.23                  | [66]      |
| FeMnzyme                                                 | Colorimetry     | 5min  | No report | 8-56                           | 0.88                  | [67]      |
| GA-AgNPs                                                 | Colorimetry     | 30min | No report | 30-200                         | 3.0                   | [68]      |
| Pd-Pt-Ir                                                 | Colorimetry     | 3min  | No report | 25-800                         | 11.7                  | [69]      |
| MnFe <sub>2</sub> O <sub>4</sub> /MoS <sub>2</sub> /SPCE | Electrochemical | -     | No report | 200-1000                       | 175                   | [70]      |
| AuNPs                                                    | Fluorescence    | 3min  | No report | 0-3000                         | 130                   | [71]      |
| Ni <sub>0.1</sub> Cu <sub>0.9</sub> S                    | Colorimetry     | 10min | 30 days   | 10-800                         | 0.84                  | This work |

**Table S5.** Determination of the amounts of AA in real samples (n=3)

| Sample       | Added(uM) | Found(uM) | Recovery(%) | RSD(%,n=3) |
|--------------|-----------|-----------|-------------|------------|
| Orange Juice | 0         | 22.05     | -           | 3.92       |
| 1            | 100       | 96.87     | 96.87       | 3.42       |
| 2            | 200       | 199.24    | 99.62       | 3.15       |
| 3            | 300       | 297.42    | 99.14       | 0.81       |
| 4            | 400       | 420.44    | 105.11      | 1.71       |
| 5            | 500       | 494.95    | 98.99       | 0.62       |



## Notes and references

54. He, Y., Li, N., Lian, J., Yang, Z., Liu, Z., Liu, Q., Zhang, X., and Zhang, X. Colorimetric Ascorbic Acid Sensing from A Synergetic Catalytic Strategy Based on 5,10,15,20-Tetra (4-Pyridyl)-21H,23H-Porphyrin Functionalized CuS Nanohexahedrons with the Enhanced Peroxidase-like Activity, *Colloids Surf., A* **2020**, 598, 124855.
55. Swaidan, A., Borthakur, P., Boruah, P. K., Das, M. R., Barras, A., Hamieh, S., Toufaily, J., Hamieh, T., Szunerits, S., and Boukherroub, R. A Facile Preparation of CuS-BSA Nanocomposite as Enzyme Mimics: Application for Selective and Sensitive Sensing of Cr(VI) Ions, *Sens. Actuators, B* **2019**, 294, 253-262.
56. Li, Y., Kang, Z., Kong, L., Shi, H., Zhang, Y., Cui, M., and Yang, D.-P. MXene-Ti<sub>3</sub>C<sub>2</sub>/CuS Nanocomposites: Enhanced Peroxidase-like Activity and Sensitive Colorimetric Cholesterol Detection, *Mater. Sci. Eng. C* **2019**, 104, 110000.
57. Tu, X., Ge, L., Deng, L., and Zhang, L. Morphology Adjustment and Optimization of CuS as Enzyme Mimics for the High Efficient Colorimetric Determination of Cr(VI) in Water, *Nanomaterials* **2022**, 12, 13423.
58. Zhang, Y., Wang, Y.-N., Sun, X.-T., Chen, L., and Xu, Z.-R. Boron Nitride Nanosheet/CuS Nanocomposites as Mimetic Peroxidase for Sensitive Colorimetric Detection of Cholesterol, *Sens. Actuators, B* **2017**, 246, 118-126.
59. Swaidan, A., Barras, A., Addad, A., Tahon, J.-F., Toufaily, J., Hamieh, T., Szunerits, S., and Boukherroub, R. Colorimetric Sensing of Dopamine in Beef Meat using Copper Sulfide Encapsulated within Bovine Serum Albumin Functionalized with Copper Phosphate (CuS-BSA-Cu<sub>3</sub>(PO<sub>4</sub>)<sub>2</sub>) Nanoparticles, *J. Colloid Interface Sci.* **2021**, 582, 732-740.
27. Zheng, X., Lian, Q., Zhou, L., Jiang, Y., and Gao, J. Peroxidase Mimicking of Binary Polyacrylonitrile-CuO Nanoflowers and the Application in Colorimetric Detection of H<sub>2</sub>O<sub>2</sub> and Ascorbic Acid, *ACS Sustainable Chem. Eng.* **2021**, 9, 7030-7043.
60. Liu, H.-Y., Xu, H.-X., Zhu, L.-L., Wen, J.-J., Qiu, Y.-B., Gu, C.-C., and Li, L.-H. Colorimetric Detection of Hydrogen Peroxide and Glutathione Based on Peroxidase Mimetic Activity of Fe<sub>3</sub>O<sub>4</sub>-sodium Lignosulfonate Nanoparticles, *Chinese J. Anal. Chem.* **2021**, 49, e21160-e21169.
61. Hashmi, S., Singh, M., Weerathunge, P., Mayes, E. L. H., Mariathomas, P. D., N. Prasad, S., Ramanathan, R., and Bansal, V. Cobalt Sulfide Nanosheets as Peroxidase Mimics for Colorimetric Detection of L-Cysteine, *ACS Appl. Nano Mater.* **2021**, 4, 13352-13362.
62. Lian, M., Liu, M., Zhang, X., Zhang, W., Zhao, J., Zhou, X., and Chen, D. Template-Regulated Bimetallic Sulfide Nanozymes with High Specificity and Activity for Visual Colorimetric Detection of Cellular H<sub>2</sub>O<sub>2</sub>, *ACS Appl. Mater. Interfaces* **2021**, 13, 53599-53609.
63. Xue, Y., Li, H., Wu, T., Zhao, H., Gao, Y., Zhu, X., and Liu, Q. Pt Deposited on Sea Urchin-like CuCo<sub>2</sub>O<sub>4</sub> Nanowires: Preparation, the Excellent Peroxidase-like Activity and the Colorimetric Detection of Sulfide Ions, *J. Environ. Chem. Eng.* **2022**, 10, 107228.
64. Zhao, T., Zhu, C., Xu, S., Wu, X., Zhang, X., Zheng, Y., Wu, M., Tong, Z., Fang, W., and Zhang, K. Fluorescent Color Analysis of Ascorbic Acid by Ratiometric Fluorescent Paper Utilizing Hybrid Carbon Dots-Silica Coated Quantum dots, *Dyes Pigm.* **2021**, 186, 108995.
65. Tarighat, M. A., Ghorghosheh, F. H., and Abdi, G. Fe<sub>3</sub>O<sub>4</sub>@SiO<sub>2</sub>-Ag Nanocomposite Colorimetric Sensor for Determination of Arginine and Ascorbic Acid Based on Synthesized Small Size AgNPs by Cystoseria Algae Extract, *MATER SCI ENG B-ADV* **2022**, 283, 115855.
66. Wang, Y.-N., Wang, S.-D., Fan, Y., Yu, L., Zha, R.-H., Liu, L.-J., Wen, L.-M., Chang, X.-P., Liu, H.-Q., and Zou, G.-D. A Dual-Chemosensor Based on Ni-CP: Fluorescence Turn-on Sensing toward Ascorbic Acid and Turn-Off Sensing toward Acetylacetone, *J. Lumin.* **2022**, 243, 118680.
67. Han, Y., Luo, L., Zhang, L., Kang, Y., Sun, H., Dan, J., Sun, J., Zhang, W., Yue, T., and Wang, J. Oxidase-like Fe-Mn Bimetallic Nanozymes for Colorimetric Detection of Ascorbic Acid in Kiwi Fruit, *LWT* **2022**, 154, 112821.
68. Doan, V.-D., Nguyen, V.-C., Nguyen, T.-L.-H., Nguyen, A.-T., and Nguyen, T.-D. Highly Sensitive and Low-Cost Colourimetric Detection of Glucose and Ascorbic Acid Based on Silver Nanozyme Biosynthesized by Gleditsia Australis Fruit, *Spectrochim. Acta, Part A* **2022**, 268, 120709.
69. He, J., He, D., Yang, L., Wu, G.-L., Tian, J., Liu, Y., and Wang, W. Preparation of Urchin-like Pd-Pt-Ir Nanozymes and Their Application for the Detection of Ascorbic Acid and Hydrogen Peroxide, *Mater. Lett.* **2022**, 314, 131851.
70. Wu, P., Huang, Y., Zhao, X., Lin, D., Xie, L., Li, Z., Zhu, Z., Zhao, H., and Lan, M. MnFe<sub>2</sub>O<sub>4</sub>/MoS<sub>2</sub> Nanocomposite as Oxidase-like for Electrochemical Simultaneous Detection of Ascorbic Acid, Dopamine and Uric Acid, *Microchem. J.* **2022**, 181, 107780.
71. Lin, S., Liu, S., Dai, G., Zhang, X., Xia, F., and Dai, Y. A Click-Induced Fluorescence-Quenching

Sensor Based on Gold Nanoparticles for Detection of Copper(II) Ion and Ascorbic Acid, *Dyes Pig.* **2021**, *195*, 109726.
